# Supplementary material
Source: PubMed Central journal article supplement (PMC3278269)
Supplement: supp_jn.111.153825_nut153825-SF1_ST1-ST3.pdf [file supp_jn.111.153825_nut153825-SF1_ST1-ST3.pdf]

# Online Supporting Material

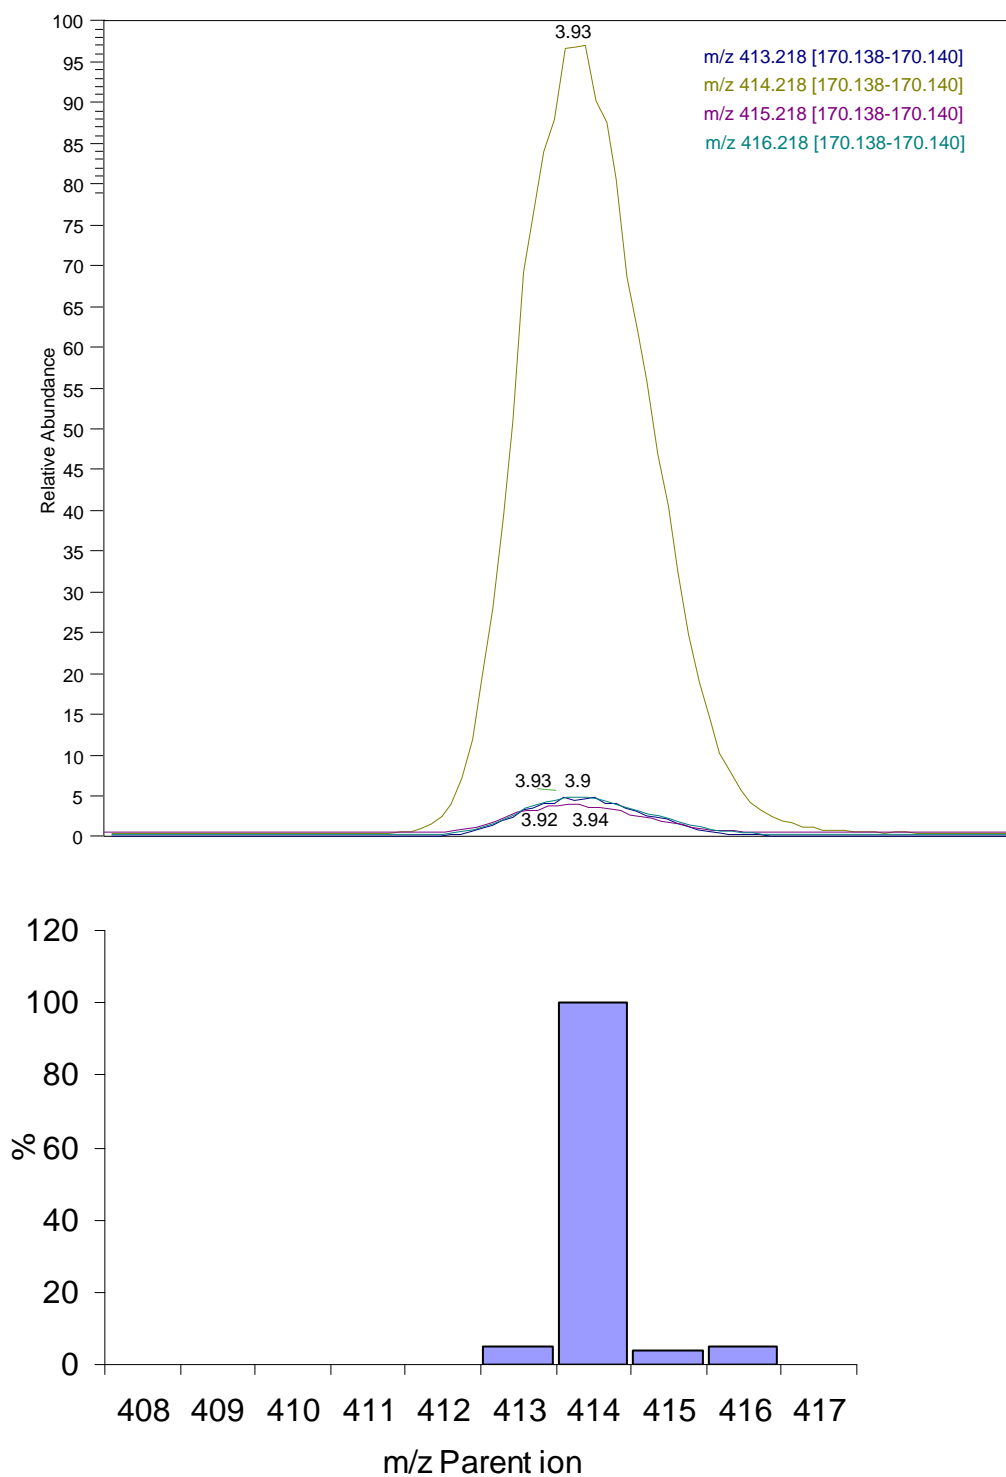

Supplemental Figure 1. Isotopologue distribution of dansylated U-<sup>13</sup>C<sub>6</sub> arginine. The m/z 414 ion corresponds to the M+6 arginine.

Online Supporting Material

Supplemental Table 1. Rate of intragastric and intravenous infusion of amino acid and glucose in mice

|                       | Infusion Rate                               |
|-----------------------|---------------------------------------------|
|                       | $\mu\text{mol kg}^{-1} \cdot \text{h}^{-1}$ |
| Intragastric infusion |                                             |
| L-Tryptophan          | 69                                          |
| L-Tyrosine            | 77                                          |
| L-Phenylalanine       | 374                                         |
| L-Leucine             | 916                                         |
| L-Valine              | 628                                         |
| L-Isoleucine          | 515                                         |
| L-Lysine              | 620                                         |
| L-Threonine           | 617                                         |
| L-Histidine           | 264                                         |
| L-Proline             | 759                                         |
| L-Arginine            | 301                                         |
| L-Alanine             | 680                                         |
| L-Aspartate           | 701                                         |
| L-Serine              | 621                                         |
| L-Glutamate           | 876                                         |
| L-Glutamine           | 638                                         |
| Glycine               | 606                                         |
| L-Methionine          | 203                                         |
| L-Cysteine            | 154                                         |
| Dextrose              | 12890                                       |
| Intravenous infusion  |                                             |
| L-Proline             | 25                                          |
| L-Arginine            | 25                                          |
| L-Glutamate           | 100                                         |
| L-Glutamine           | 100                                         |

Online Supporting Material

Supplemental Table 2. Precursor-intermediate-product model. Tracer recovered in plasma ornithine and precursor contribution to plasma ornithine in fed and feed-deprived mice

|                     | Tracer recovered                          |            | Precursor contribution                    |             |
|---------------------|-------------------------------------------|------------|-------------------------------------------|-------------|
|                     | $\mu\text{mol kg}^{-1}\cdot\text{h}^{-1}$ | % infused  | $\mu\text{mol kg}^{-1}\cdot\text{h}^{-1}$ | %RaOrn      |
| Fed                 |                                           |            |                                           |             |
| Dietary Precursors  |                                           |            |                                           |             |
| Arginine            | 39.3 ± 1.4                                | 39.1 ± 1.1 | 117.9 ± 4.1                               | 44.8 ± 2.0  |
| Glutamine           | 1.0 ± 0.0                                 | 0.5 ± 0.0  | 3.0 ± 0.1                                 | 1.2 ± 0.1   |
| Glutamate           | 1.6 ± 0.2                                 | 0.9 ± 0.1  | 6.8 ± 0.8                                 | 2.9 ± 0.4   |
| Proline             | 2.3 ± 0.4                                 | 2.2 ± 0.2  | 17.3 ± 2.7                                | 7.4 ± 0.9   |
| Plasma Precursors   |                                           |            |                                           |             |
| Arginine            | 4.8 ± 0.3                                 | 19.1 ± 1.6 | 90.4 ± 7.4                                | 44.0 ± 3.3  |
| Glutamine           | 0.8 ± 0.0                                 | 0.8 ± 0.0  | 24.6 ± 1.6                                | 11.5 ± 0.7  |
| Glutamate           | 0.7 ± 0.0                                 | 0.7 ± 0.0  | 5.6 ± 1.0                                 | 2.9 ± 0.5   |
| Proline             | 0.9 ± 0.0                                 | 3.4 ± 0.1  | 36.4 ± 2.8                                | 16.1 ± 1.9  |
| Total Fed           |                                           |            | 302.0 ± 9.5                               | 130.8 ± 3.9 |
| Feed-deprived       |                                           |            |                                           |             |
| Plasma Precursors   |                                           |            |                                           |             |
| Arginine            | 6.7 ± 0.6                                 | 26.9 ± 2.4 | 103.3 ± 11.3                              | 89.7 ± 4.2  |
| Glutamine           | 0.8 ± 0.1                                 | 0.8 ± 0.0  | 16.2 ± 1.4                                | 11.4 ± 1.2  |
| Glutamate           | 0.7 ± 0.0                                 | 0.7 ± 0.0  | 5.0 ± 1.1                                 | 3.9 ± 1.0   |
| Proline             | 0.9 ± 0.0                                 | 3.5 ± 0.0  | 10.8 ± 0.4                                | 7.1 ± 1.0   |
| Total Feed-deprived |                                           |            | 135.3 ± 11.4                              | 112.1 ± 4.6 |

<sup>1</sup>Values are means ± SEM, *n* =5. Values were obtained using Equations 4, 5, 6 and 7

Online Supporting Material

Supplemental Table 3. Multifactorial Model. Precursor contribution to plasma ornithine in fed and feed-deprived mice

|                     | Full Model                                |                         | AIC selected model <sup>b</sup>           |             |
|---------------------|-------------------------------------------|-------------------------|-------------------------------------------|-------------|
|                     | $\mu\text{mol kg}^{-1}\cdot\text{h}^{-1}$ | %RaOrn                  | $\mu\text{mol kg}^{-1}\cdot\text{h}^{-1}$ | %RaOrn      |
| Fed                 |                                           |                         |                                           |             |
| Dietary Precursors  |                                           |                         |                                           |             |
| Arginine            | 57.4 ± 1.8                                | 26.8 ± 0.9              | 57.1 ± 2.0                                | 26.7 ± 0.9  |
| Glutamine           | 0.9 ± 1.2 <sup>a</sup>                    | 0.4 ± 0.6 <sup>a</sup>  | 0.9 ± 1.3                                 | 0.4 ± 0.6   |
| Glutamate           | 4.3 ± 1.2                                 | 2.0 ± 0.8               |                                           |             |
| Proline             | -1.9 ± 9.4                                | -0.9 ± 4.4 <sup>a</sup> |                                           |             |
| Plasma Precursors   |                                           |                         |                                           |             |
| Arginine            | 103.6 ± 9.0                               | 48.4 ± 4.2              | 104.0 ± 9.7                               | 48.6 ± 4.5  |
| Glutamine           | 23.1 ± 15.0                               | 10.8 ± 7.0 <sup>a</sup> | 27.8 ± 15.8                               | 13.0 ± 7.4  |
| Glutamate           | 3.6 ± 3.3                                 | 1.7 ± 1.5 <sup>a</sup>  |                                           |             |
| Proline             | 27.0 ± 17.1                               | 12.6 ± 8.0 <sup>a</sup> | 23.5 ± 6.9                                | 11.0 ± 3.2  |
| Total Fed           | 217.9 ± 26.9                              | 101.8 ± 12.4            | 213.4 ± 19.9                              | 99.3 ± 9.3  |
| Feed-deprived       |                                           |                         |                                           |             |
| Plasma Precursors   |                                           |                         |                                           |             |
| Arginine            | 126.8 ± 3.1                               | 89.9 ± 2.2              | 126.8 ± 3.1                               | 89.9 ± 2.2  |
| Glutamine           | 14.8 ± 4.0                                | 10.5 ± 2.9              | 14.8 ± 4.0                                | 10.5 ± 2.9  |
| Glutamate           | 3.4 ± 1.2                                 | 2.4 ± 0.9               | 3.4 ± 1.2                                 | 2.4 ± 0.9   |
| Proline             | 8.9 ± 2.5                                 | 6.3 ± 1.8               | 8.9 ± 2.5                                 | 6.3 ± 1.8   |
| Total Feed-deprived | 153.8 ± 5.8                               | 109.1 ± 4.2             | 153.8 ± 5.8                               | 109.1 ± 4.2 |

<sup>1</sup>Values are means ± SEM, *n* =5. Values were obtained using Equations 10 and 11

<sup>a</sup>Not different from 0, *P* > 0.05

<sup>b</sup>Akaike's Information Criterion selected model
